# Supplementary figures and images for: Metabolomic Profiling Reveals Cellular Reprogramming of B-Cell Lymphoma by a Lysine Deacetylase Inhibitor through the Choline Pathway
Source: PubMed Central journal article supplement — eBioMedicine. 2018 Jan 31;28:80–9. doi: 10.1016/j.ebiom.2018.01.014 (PMC5835559; doi:10.1016/j.ebiom.2018.01.014), 2018-01-31

Superpathway

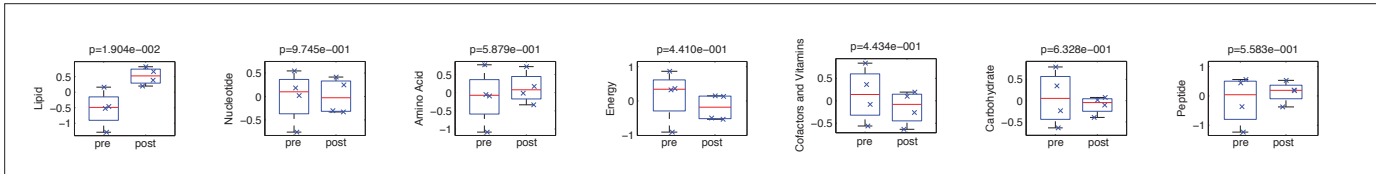

Subpathway

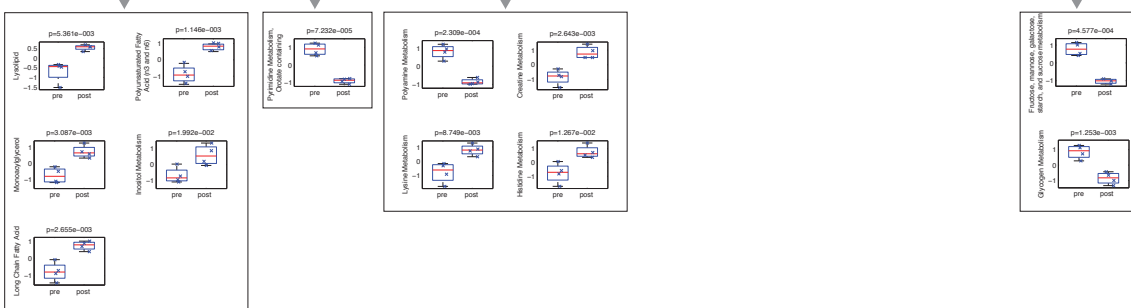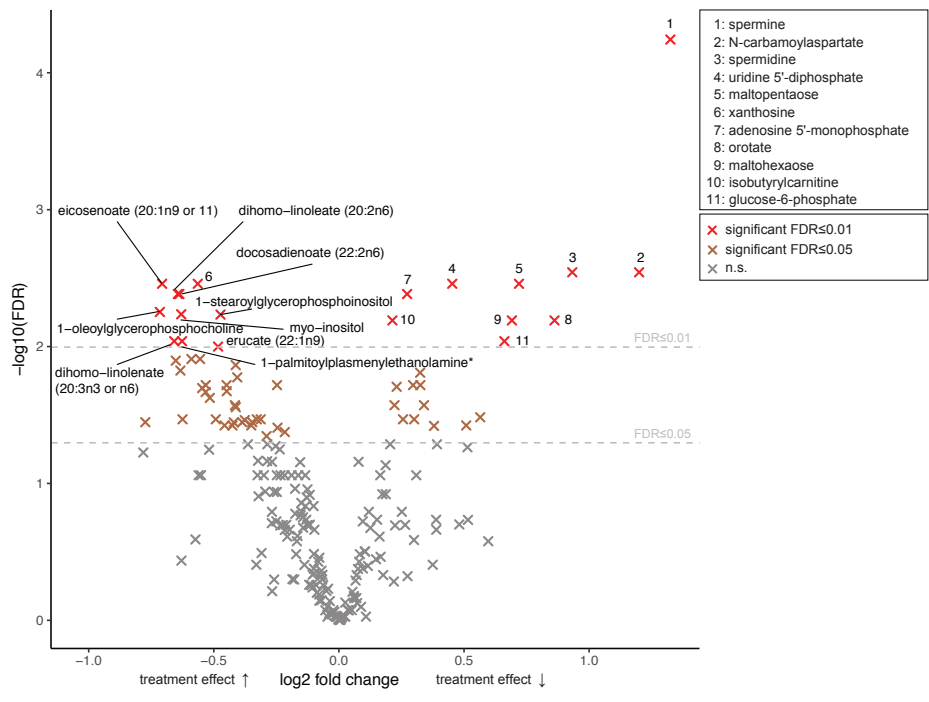

Supplement: mmc1.pdf [file mmc1.pdf]
